# Supplementary material for: Surface temperature response to regional Black Carbon emissions: Do location and magnitude matter?
Source: Copernicus journal article supplement (doi:10.5194/acp-2019-604), 2019-08-23
Supplement: Supplementary file 1 [file acp-2019-604-supplement.pdf]

## Supplementary figures

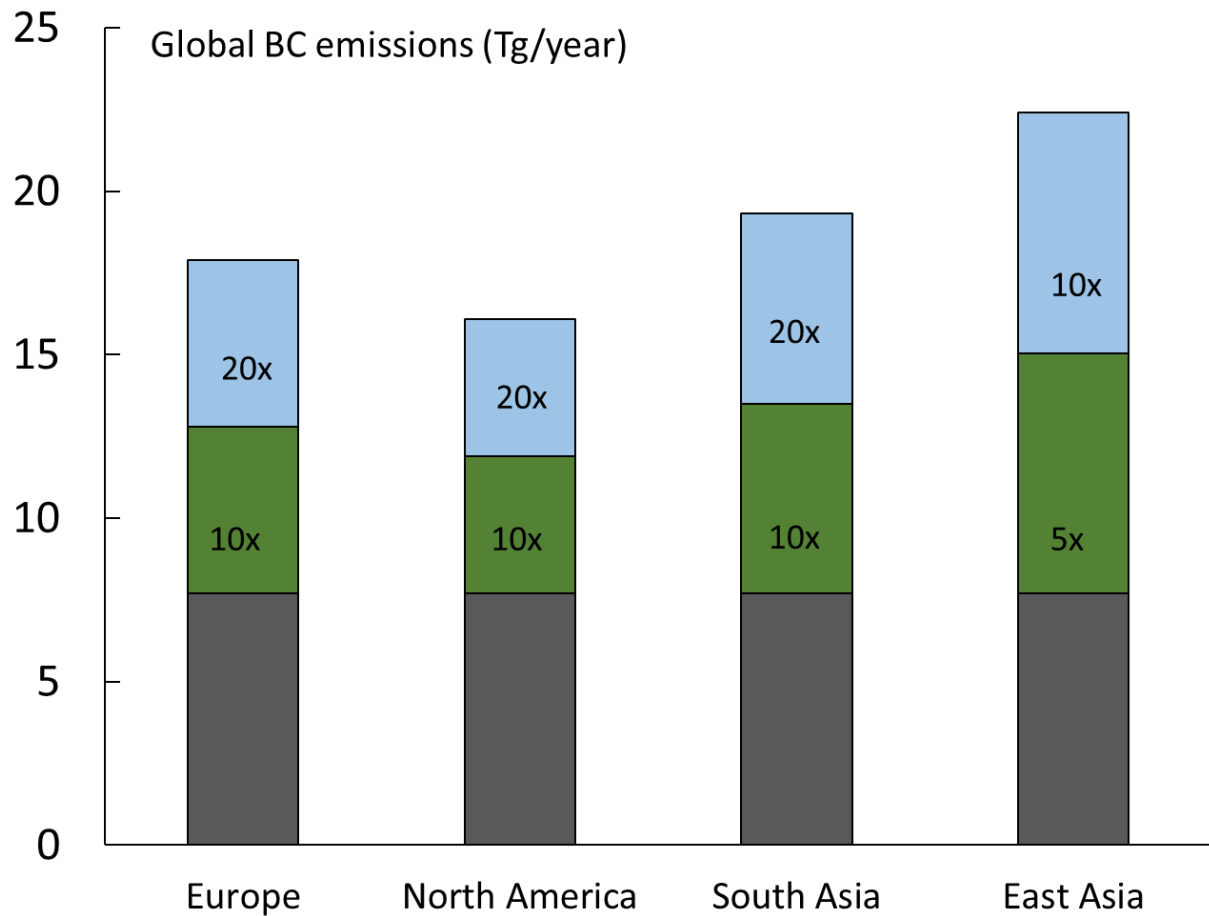

**Figure S1: Global BC emissions (in Tg/yr).** Grey bars represent the baseline emissions. Green bars represent the added increase in global BC emissions for the lowest emission rates (10×BC emissions for Europe, North America and South Asia, and 5×BC emissions in East Asia), i.e. total global emissions are then grey+green bars. Total height of the bars (grey+green+blue) represent the global BC emissions for the highest emission rates (20×BC emissions for Europe, North America and South Asia, and 10×BC emissions in East Asia).

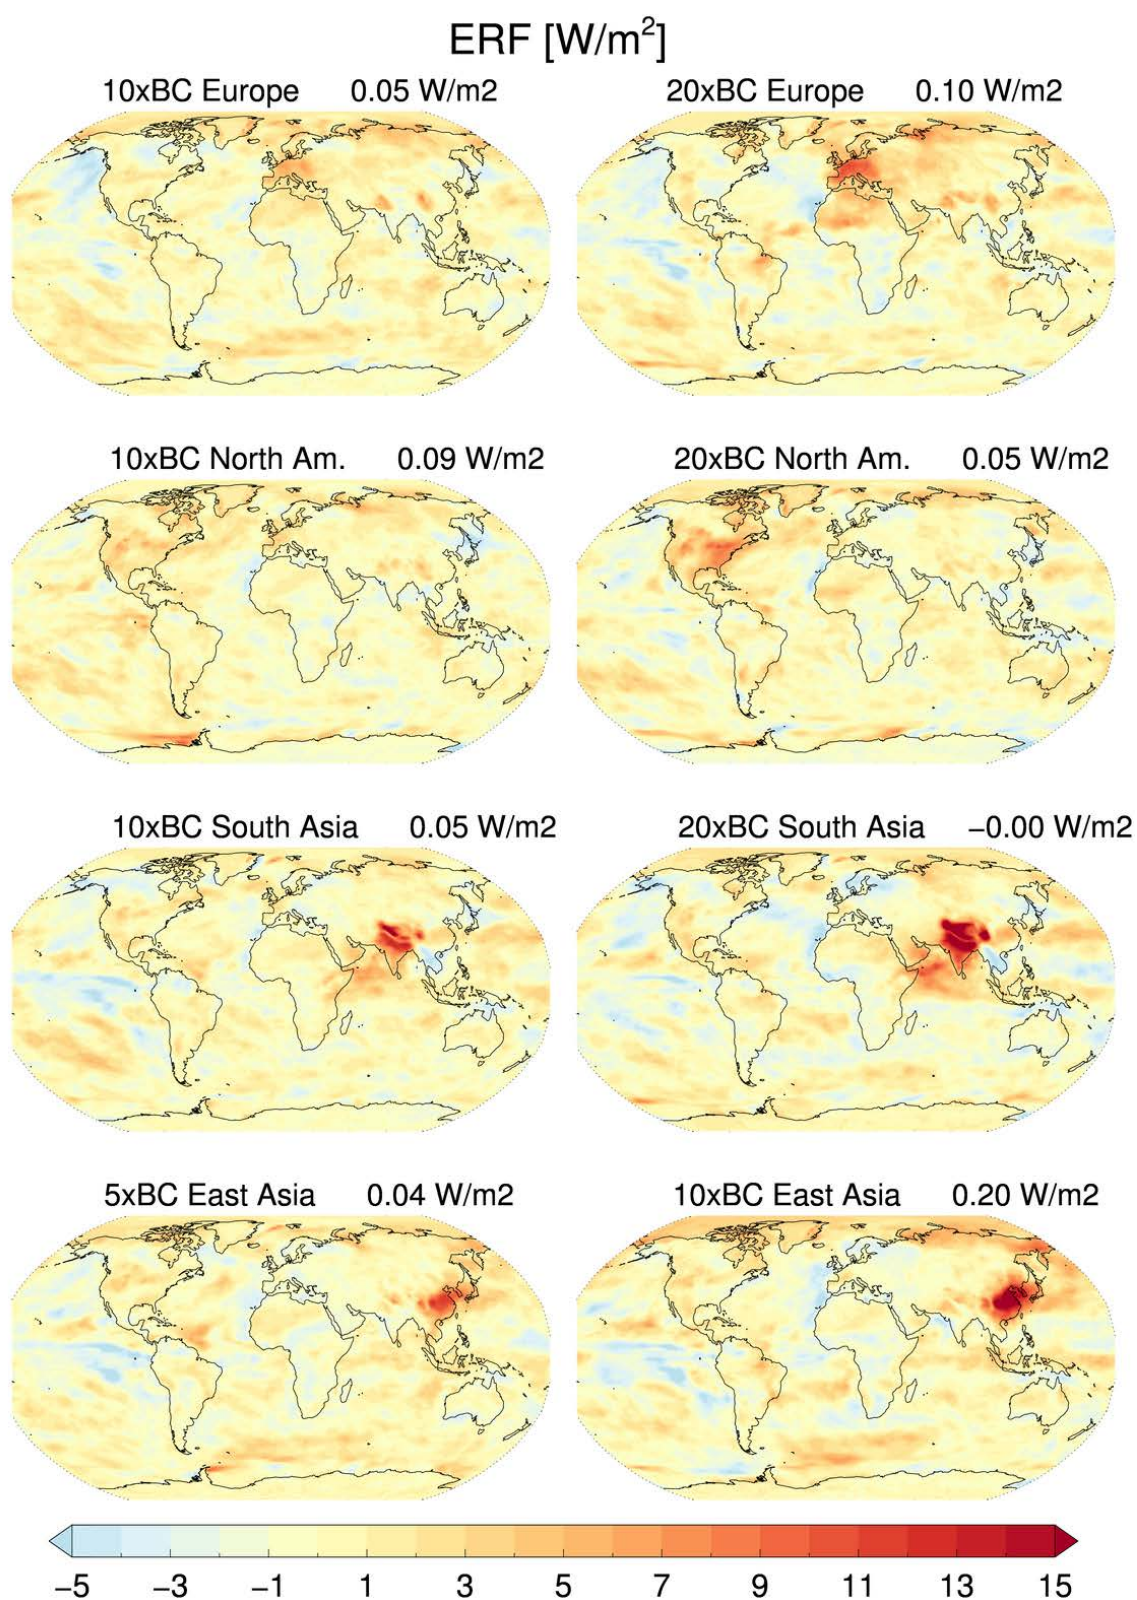

**Figure S2: Effective radiative forcing (in  $\text{Wm}^{-2}$ ) to BC emissions perturbations. The emission location (Europe, North America, South Asia, East Asia) is given on top of each plot. In the right-side column the emission rate is doubled compared to the left-side column.**

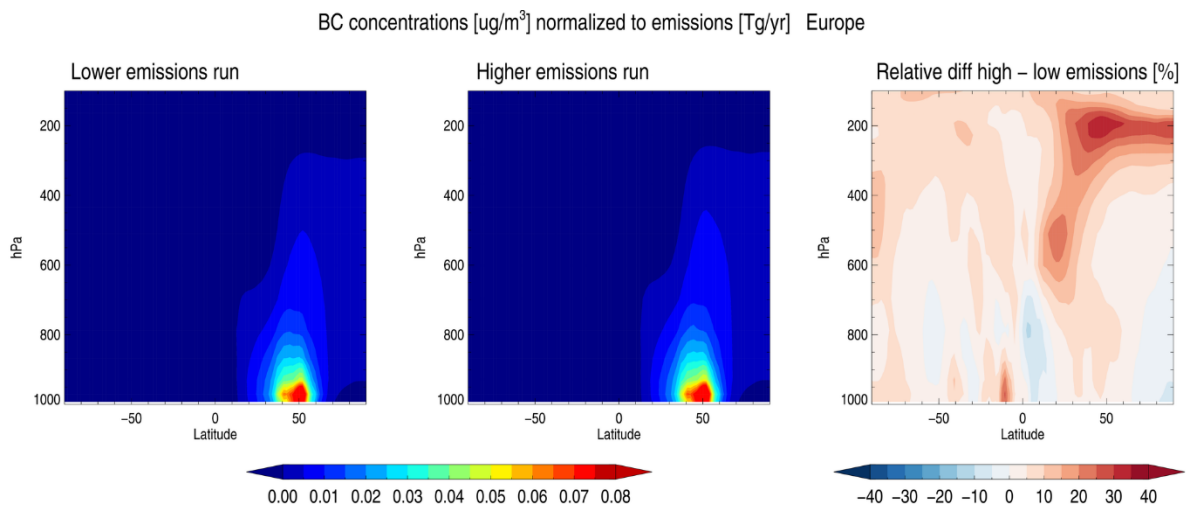

**Figure S3: Zonal mean BC concentrations normalized to emissions for European emission perturbations.**

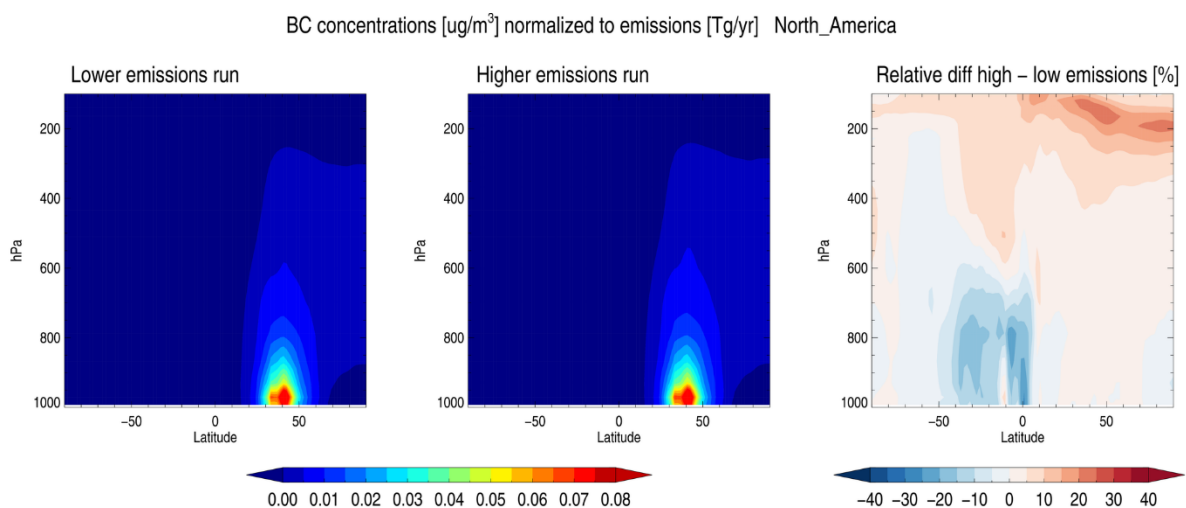

**Figure S4: As S3, but for North American emission perturbations.**

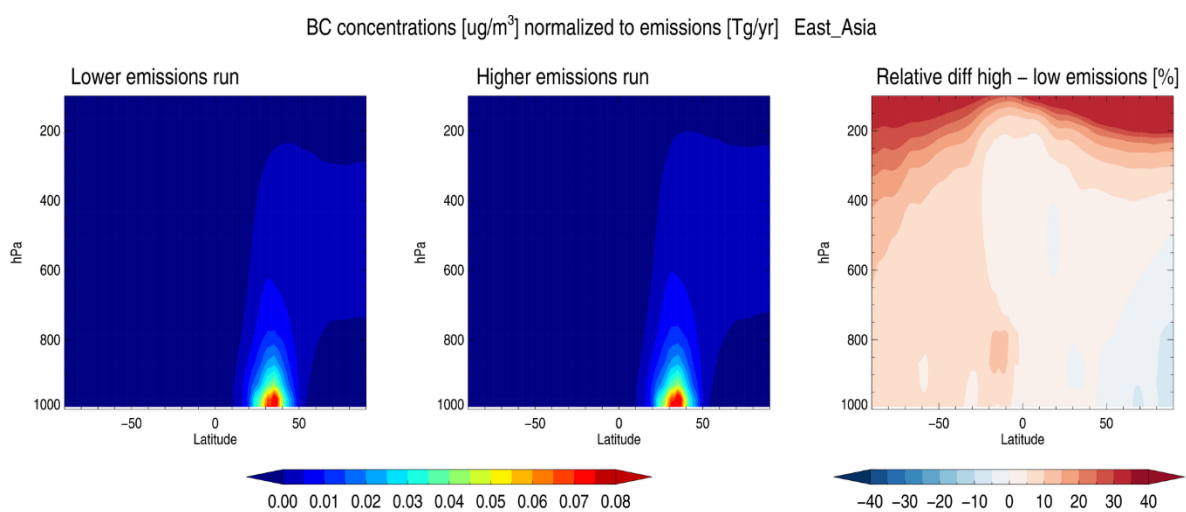

**Figure S5: As S3, but for East Asian emission perturbations.**

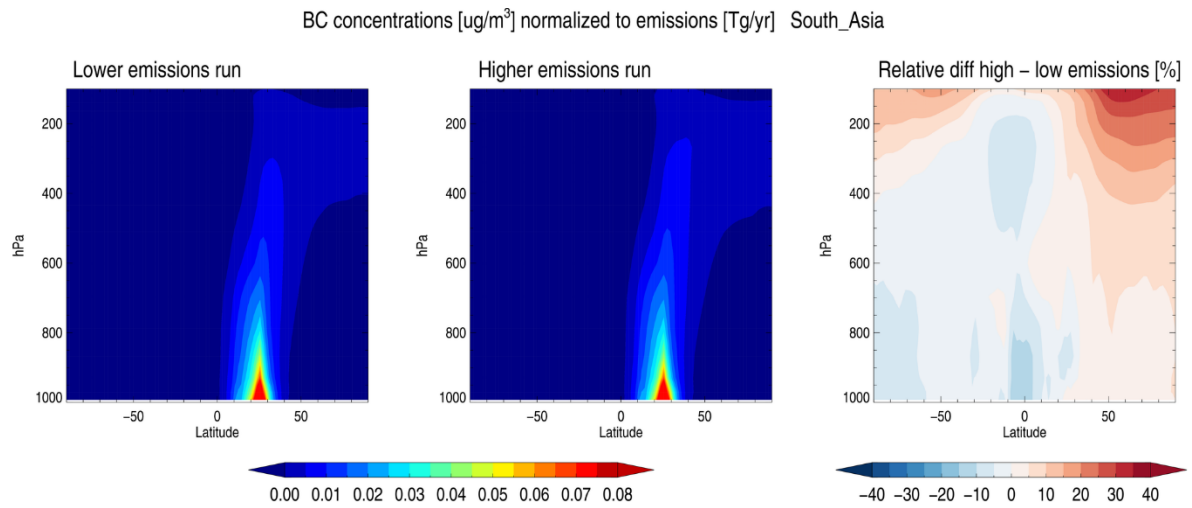

**Figure S6: As S3, but for South Asian emission perturbations.**
